# Supplementary material
Source: MDPI journal article supplement (https://www.mdpi.com/2071-1050/15/1/862)
Supplement: s1 [file s1]

**Table S1.** Raw data for free amino acids analysis of white shrimps (*Penaeus vannamei*).

| Amino acid<br>mg/100g | A: Short-term culture (27 days, n = 3) |                |                | B: Long-term culture (160 days, n = 6) |                |                |                |                |                | C : Local samples (N/A days, seawater 15-32 psu, n = 6) |                |                |                |                |                |
|-----------------------|----------------------------------------|----------------|----------------|----------------------------------------|----------------|----------------|----------------|----------------|----------------|---------------------------------------------------------|----------------|----------------|----------------|----------------|----------------|
|                       | A1                                     | A2             | A3             | B1                                     | B2             | B3             | B4             | B5             | B6             | C1                                                      | C2             | C3             | C4             | C5             | C6             |
| Asp                   | 0.00                                   | 3.64           | 0.00           | 0.00                                   | 0.00           | 0.00           | 6.44           | 0.00           | 0.00           | 0.00                                                    | 0.00           | 0.00           | 12.67          | 10.26          | 8.72           |
| Glu                   | 57.78                                  | 42.60          | 60.10          | 0.00                                   | 0.00           | 0.00           | 0.00           | 0.00           | 0.00           | 0.00                                                    | 0.00           | 0.00           | 0.00           | 0.00           | 0.00           |
| Ser                   | 19.25                                  | 12.33          | 17.30          | 7.63                                   | 7.42           | 7.31           | 6.07           | 6.45           | 6.96           | 132.84                                                  | 155.66         | 86.36          | 139.70         | 102.11         | 68.40          |
| Gly                   | 1828.15                                | 1561.85        | 1295.31        | 670.83                                 | 677.63         | 739.46         | 636.66         | 639.60         | 689.50         | 362.58                                                  | 304.29         | 318.57         | 371.16         | 278.48         | 243.27         |
| His                   | 0.00                                   | 0.00           | 0.00           | 0.00                                   | 0.00           | 0.00           | 0.00           | 0.00           | 0.00           | 0.00                                                    | 0.00           | 0.00           | 0.00           | 0.00           | 0.00           |
| Arg                   | 1508.78                                | 1241.12        | 925.09         | 385.93                                 | 539.11         | 605.57         | 685.89         | 636.53         | 553.58         | 344.14                                                  | 334.05         | 381.67         | 339.40         | 246.56         | 220.13         |
| Thr                   | 0.00                                   | 0.00           | 22.16          | 0.00                                   | 0.00           | 0.00           | 0.00           | 0.00           | 0.00           | 0.00                                                    | 0.00           | 0.00           | 0.00           | 0.00           | 0.00           |
| Ala                   | 62.57                                  | 129.24         | 51.73          | 30.43                                  | 29.80          | 51.45          | 35.15          | 44.27          | 39.35          | 83.47                                                   | 85.47          | 58.51          | 94.65          | 58.56          | 59.17          |
| Pro                   | 413.44                                 | 102.77         | 222.83         | 47.42                                  | 15.96          | 16.81          | 15.52          | 27.69          | 19.85          | 329.06                                                  | 329.03         | 286.28         | 356.37         | 305.93         | 307.62         |
| Tyr                   | 22.63                                  | 10.54          | 11.07          | 11.87                                  | 8.77           | 7.62           | 7.50           | 36.46          | 7.46           | 18.45                                                   | 24.83          | 9.97           | 17.43          | 14.42          | 9.93           |
| Val                   | 16.94                                  | 6.07           | 14.14          | 9.23                                   | 0.00           | 6.81           | 8.69           | 7.59           | 6.27           | 12.53                                                   | 21.66          | 12.72          | 24.59          | 19.21          | 15.14          |
| Met                   | 9.87                                   | 7.08           | 9.15           | 8.14                                   | 9.00           | 11.93          | 6.97           | 6.59           | 8.27           | 6.77                                                    | 6.28           | 8.17           | 10.19          | 7.69           | 5.90           |
| Cys                   | 33.10                                  | 7.17           | 4.18           | 18.01                                  | 17.08          | 19.82          | 22.45          | 20.16          | 13.81          | 31.02                                                   | 18.18          | 21.27          | 23.40          | 17.79          | 18.19          |
| Ile                   | 19.03                                  | 5.85           | 8.31           | 7.97                                   | 0.00           | 29.40          | 6.04           | 15.24          | 0.00           | 0.00                                                    | 17.32          | 7.80           | 12.71          | 11.18          | 8.98           |
| Leu                   | 34.93                                  | 19.66          | 18.11          | 38.03                                  | 52.73          | 75.40          | 65.94          | 70.79          | 54.73          | 0.00                                                    | 28.77          | 21.76          | 31.95          | 22.59          | 18.50          |
| Phe                   | 11.60                                  | 4.26           | 6.17           | 8.62                                   | 0.00           | 8.27           | 8.62           | 8.54           | 7.36           | 52.53                                                   | 12.08          | 7.50           | 8.74           | 10.48          | 9.21           |
| Lys                   | 31.84                                  | 16.67          | 15.47          | 42.45                                  | 38.78          | 38.80          | 43.38          | 34.35          | 39.75          | 55.42                                                   | 15.01          | 10.20          | 19.96          | 10.39          | 9.63           |
| <b>Total</b>          | <b>4069.92</b>                         | <b>3170.85</b> | <b>2681.12</b> | <b>1286.56</b>                         | <b>1396.29</b> | <b>1618.65</b> | <b>1555.32</b> | <b>1554.26</b> | <b>1446.88</b> | <b>1428.80</b>                                          | <b>1352.62</b> | <b>1230.78</b> | <b>1462.93</b> | <b>1115.64</b> | <b>1002.79</b> |

**Table S2.** Raw data for free amino acids analysis of groupers (*Epinephelus Lanceolatus*).

| Amino acid<br>mg/100g | A: Short-term culture (27 days, n = 3) |        |        | B: Long-term culture (75 days, n = 6) |        |        |        |        |        | C: Local samples (N/A, n = 3) |        |        |
|-----------------------|----------------------------------------|--------|--------|---------------------------------------|--------|--------|--------|--------|--------|-------------------------------|--------|--------|
|                       | A1                                     | A2     | A3     | B1                                    | B2     | B3     | B4     | B5     | B6     | C1                            | C2     | C3     |
| Asp                   | 0.00                                   | 0.00   | 0.00   | 0.00                                  | 8.12   | 10.25  | 9.35   | 6.51   | 0.00   | 0.00                          | 0.00   | 0.00   |
| Glu                   | 21.62                                  | 14.34  | 20.26  | 0.00                                  | 0.00   | 0.00   | 0.00   | 0.00   | 0.00   | 0.00                          | 0.00   | 0.00   |
| Ser                   | 42.23                                  | 32.14  | 36.15  | 30.19                                 | 35.78  | 54.21  | 55.29  | 76.90  | 29.42  | 39.38                         | 0.00   | 0.00   |
| Gly                   | 121.50                                 | 265.41 | 166.38 | 22.67                                 | 37.58  | 42.31  | 49.05  | 32.12  | 36.01  | 43.90                         | 94.93  | 82.49  |
| His                   | 0.00                                   | 0.00   | 0.00   | 0.00                                  | 0.00   | 0.00   | 0.00   | 0.00   | 0.00   | 0.00                          | 0.00   | 0.00   |
| Arg                   | 364.73                                 | 539.19 | 467.47 | 162.82                                | 321.60 | 384.68 | 350.42 | 255.71 | 177.26 | 131.91                        | 197.84 | 185.92 |
| Thr                   | 22.13                                  | 16.75  | 18.24  | 0.00                                  | 0.00   | 0.00   | 0.00   | 0.00   | 8.89   | 10.31                         | 14.12  | 14.30  |
| Ala                   | 79.11                                  | 68.29  | 56.09  | 11.81                                 | 24.62  | 29.01  | 20.04  | 71.81  | 35.22  | 11.56                         | 17.17  | 16.93  |
| Pro                   | 24.01                                  | 11.35  | 26.50  | 44.90                                 | 58.60  | 99.29  | 69.87  | 84.81  | 4.88   | 40.00                         | 52.28  | 51.18  |
| Tyr                   | 0.00                                   | 0.00   | 0.00   | 80.17                                 | 12.04  | 7.30   | 8.03   | 11.61  | 83.90  | 10.62                         | 11.58  | 12.03  |
| Val                   | 1.12                                   | 1.18   | 1.78   | 6.80                                  | 10.33  | 14.21  | 10.74  | 5.31   | 7.05   | 6.23                          | 8.87   | 8.17   |
| Met                   | 2.26                                   | 2.04   | 2.78   | 7.30                                  | 12.43  | 10.33  | 10.15  | 11.29  | 6.61   | 10.71                         | 11.10  | 11.95  |
| Cys                   | 10.36                                  | 6.54   | 8.15   | 17.22                                 | 23.53  | 20.81  | 21.59  | 21.00  | 13.74  | 21.90                         | 19.49  | 22.98  |
| Ile                   | 0.00                                   | 6.10   | 2.21   | 0.00                                  | 0.00   | 0.00   | 5.76   | 0.00   | 0.00   | 0.00                          | 0.00   | 0.00   |
| Leu                   | 7.29                                   | 12.42  | 11.79  | 23.22                                 | 35.18  | 28.80  | 38.99  | 32.03  | 14.85  | 7.90                          | 10.16  | 11.29  |
| Phe                   | 0.00                                   | 0.00   | 0.00   | 0.00                                  | 0.00   | 0.00   | 0.00   | 0.00   | 0.00   | 0.00                          | 0.00   | 0.00   |
| Lys                   | 14.13                                  | 16.29  | 14.91  | 4.29                                  | 5.54   | 3.49   | 4.21   | 4.17   | 3.31   | 14.80                         | 23.85  | 22.53  |
| Total                 | 710.49                                 | 992.04 | 832.71 | 411.39                                | 585.36 | 704.68 | 653.47 | 613.28 | 421.14 | 349.21                        | 461.41 | 439.77 |
